# Supplementary material for: CD5 Deficiency Alters Helper T Cell Metabolic Function and Shifts the Systemic Metabolome
Source: Biomedicines. 2022 Mar 18;10(3):704. doi: 10.3390/biomedicines10030704 (PMC8945004; doi:10.3390/biomedicines10030704)
Supplement: Supplementary file 1 [file biomedicines-10-00704-s001.zip › biomedicines-1600907-supplementary.pdf]

**Table S1.** qPCR primers used for RNA-Sequencing validation.

| Gene       | Forward Primer          | Reverse Primer          |
|------------|-------------------------|-------------------------|
| GOT1       | TGCTACTGGGATGCGGAGAAGA  | TGCATGACAGCAGCGATCTGCT  |
| GOT2       | GCGGTTTTGACTTCTCTGGAGC  | ACGGACGCTATCTCCTTCCACT  |
| GALM       | GAAGGAGTACCACCTGCCAGTT  | TGGACGCCATTGGTCAACACCT  |
| ALDOA      | CACGAGACACTGTACCAGAAGG  | TTGTCTCGCCATTGGTTCCTGC  |
| ALDOC      | CACTCAATGCCTGGAGAGGACA  | CGCCATCTCCACTGCCTTCATA  |
| TPI1       | GGCAACTGGAAGATGAACGGGA  | CTGGCAAAGTCGATGTAAGCGG  |
| GAPDH      | CATCACTGCCACCCAGAAGACTG | ATGCCAGTGAGCTTCCCGTTCAG |
| PGK1       | GATGCTTTCCGAGCCTCACTGT  | ACCAGCCTTCTGTGGCAGATTC  |
| PGAM1      | CCCCTTCTACAGCAACATCAGC  | GCTCTGGCAATAGTGTCTTCAG  |
| ENO1b      | GATTGCGACCTAACATCCTGGAG | TTCAGAGGCAGCCACATCCATG  |
| BCAT1      | CTGCCTCTGTTTTGCACTACGC  | TCCTCACAGCAGATCGGCACAT  |
| SDHB       | TGCGGACCTATGGTGTGGATG   | CCAGAGTATTGCCTCCGTTGATG |
| ALDH7a1    | CCTCGTTAGTGTGGCTGTCACA  | AAGGACAGCAGGTTACACGCT   |
| GCG        | CCTTCAAGACACAGAGGAGAACC | CTGTAGTCGCTGGTGAATGTGC  |
| ASNS       | TTACCTGTCTCTGCCGCCAGAT  | CACTGAAGGCTTCTTTGGGTCG  |
| GSTT3      | CAGGTGCTAGAGGACAAGTTCC  | GATTTTGCAGCCAGCACTGACAG |
| Fah        | G TTCAGAGGCAAGGAGAATGCG | GGCACCATACACAGGAGGCTTT  |
| SLC25a13   | TGGCAACAGGAAAGACGTGGAG  | CCGCTCAATGTCTGCTAAGGTC  |
| SLC1a4     | GAGGGAGAAGACCTCATCCGAT  | GTCACCAGCATGACGATGTCCT  |
| SLC5a3     | CCTGGTGACAAAGGAGAGCTGT  | GGCTGATGACTTCGCTATTCTCG |
| SLC7a10    | TGCTACGGAGTCACTATCCTGG  | GCTGAAGACCAGTAGGAATGCC  |
| SLC43a1    | TTCCTGTGGAGCCTTGTCACCA  | CTCCACCTTCTGTCTCTGCTCA  |
| beta Actin | CATTGCTGACAGGATGCAGAAGG | TGCTGGAAGGTGGACAGTGAGG  |

**Table S2.** Metabolic gene abbreviations.

| <b>Gene Abbreviation</b> | <b>Gene Name</b>                                           |
|--------------------------|------------------------------------------------------------|
| ACLY                     | ATP citrate lyase                                          |
| ACSF2                    | acyl-CoA synthetase family member 2                        |
| ACSS1                    | acyl-CoA synthetase short-chain family member 1            |
| ACSS2                    | acyl-CoA synthetase short-chain family member 2            |
| ALDOA                    | Aldolase A                                                 |
| ALDOC                    | Aldolase C                                                 |
| ALDH7a1                  | aldehyde dehydrogenase family 7, member A1                 |
| ASNS                     | asparagine synthetase                                      |
| BCAT1                    | branched chain aminotransferase 1, cytosolic               |
| DECR1                    | 2,4-dienoyl CoA reductase 1, mitochondrial                 |
| ECHDC2                   | enoyl Coenzyme A hydratase domain containing 2             |
| ENO1b                    | enolase 1b                                                 |
| FAH                      | fumarylacetoacetate hydrolase                              |
| GALM                     | galactose mutarotase                                       |
| GAPDH                    | glyceraldehyde-3-phosphate dehydrogenase                   |
| GCG                      | glucagon                                                   |
| GLDC                     | glycine decarboxylase                                      |
| GOT1                     | glutamic-oxaloacetic transaminase 1, soluble               |
| GOT2                     | glutamatic-oxaloacetic transaminase 2, mitochondrial       |
| GSTT3                    | glutathione S-transferase, theta 3                         |
| H6PD                     | hexose-6-phosphate dehydrogenase (glucose 1-dehydrogenase) |
| HAL                      | histidine ammonia lyase                                    |
| ODC1                     | ornithine decarboxylase 1                                  |
| PDK1                     | pyruvate dehydrogenase kinase, isoenzyme 1                 |
| PDK3                     | pyruvate dehydrogenase kinase, isoenzyme 3                 |
| PGAM1                    | phosphoglycerate mutase 1                                  |
| PGK1                     | phosphoglycerate kinase 1                                  |
| PPA1                     | pyrophosphatase (inorganic) 1                              |
| SCCPDH                   | saccharopine dehydrogenase                                 |
| SDHB                     | succinate dehydrogenase complex, subunit B                 |
| TP11                     | triosephosphate isomerase 1                                |

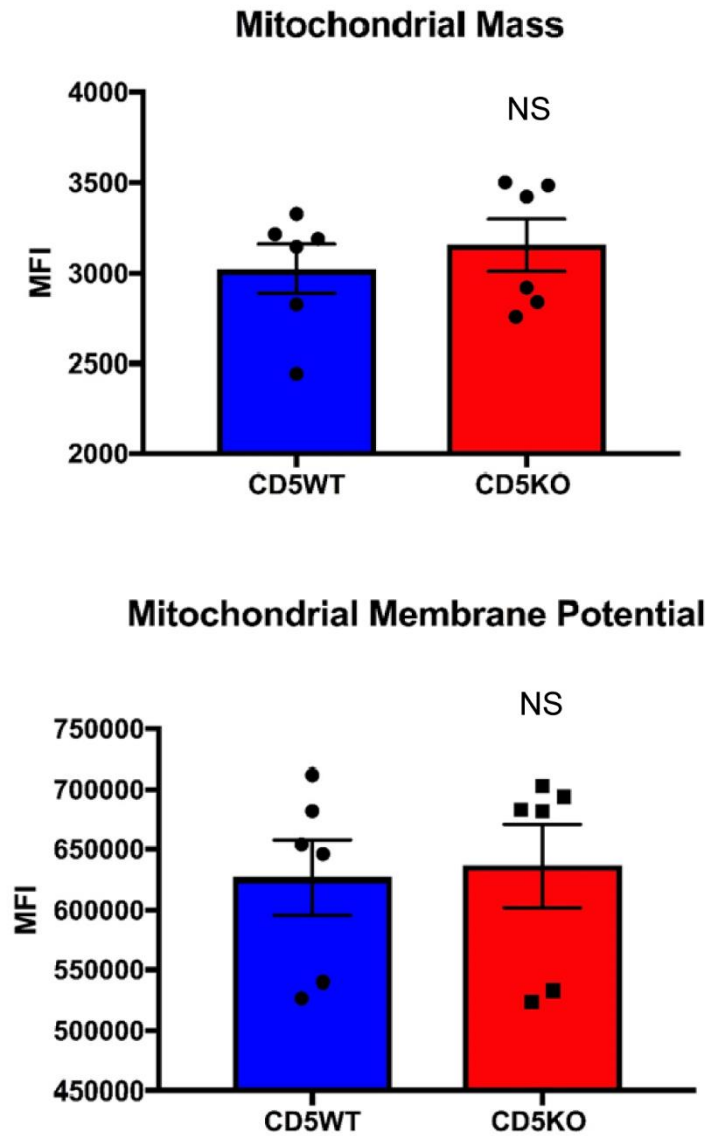

**Figure S1.** Mitochondrial mass and membrane potential were not significantly different between CD5WT and CD5KO CD4<sup>+</sup> unstimulated T cells. (**Top**)  $5 \times 10^6$  CD4<sup>+</sup> T cells were stained with MitoTracker Green (Thermofisher) and incubated for 30 minutes at 4 °C ( $n = 6$ ,  $p$ -value = 0.5168 by paired  $t$  test). 50,000 events were recorded using the BD Accuri flow cytometer. (**Bottom**)  $5 \times 10^6$  CD4<sup>+</sup> T cells were stained with MitoProbe DilC1(5) (Thermofisher) and incubated for 30 minutes at 4 °C ( $n = 6$ ,  $p$ -value = 0.8387 by paired  $t$  test). 50,000 events were recorded using the BD Accuri flow cytometer. MFI was determined using the mean as calculated by FlowJo.

**Table S3.** Functional Analysis of RNA-Seq Hits using DAVID.

| Pathway                                                | Number of Gene Hits | <i>p</i> -Value       | Benjamini             |
|--------------------------------------------------------|---------------------|-----------------------|-----------------------|
| Cell Cycle                                             | 29                  | $1.20 \times 10^{-8}$ | $4.00 \times 10^{-6}$ |
| Pathways in cancer                                     | 65                  | $7.10 \times 10^{-6}$ | $1.10 \times 10^{-3}$ |
| DNA Replication                                        | 12                  | $1.20 \times 10^{-5}$ | $1.30 \times 10^{-3}$ |
| MAPK signaling pathway                                 | 38                  | $1.80 \times 10^{-4}$ | $1.40 \times 10^{-2}$ |
| Inflammatory bowel disease                             | 14                  | $2.10 \times 10^{-4}$ | $1.40 \times 10^{-2}$ |
| Carbon metabolism                                      | 20                  | $4.70 \times 10^{-4}$ | $2.40 \times 10^{-2}$ |
| Chemokine signaling pathway                            | 27                  | $5.30 \times 10^{-4}$ | $2.40 \times 10^{-2}$ |
| HIF-1 signaling pathway                                | 19                  | $6.10 \times 10^{-4}$ | $2.50 \times 10^{-2}$ |
| Biosynthesis of amino acids                            | 15                  | $7.60 \times 10^{-4}$ | $2.50 \times 10^{-2}$ |
| PD-L1 expression and PD-1 checkpoint pathway in cancer | 16                  | $7.60 \times 10^{-4}$ | $2.50 \times 10^{-2}$ |
| Progesterone-mediated oocyte maturation                | 16                  | $1.20 \times 10^{-3}$ | $3.40 \times 10^{-2}$ |
| Cytokine-cytokine receptor interaction                 | 35                  | $1.30 \times 10^{-3}$ | $3.40 \times 10^{-2}$ |
| C-type lectin receptor signaling pathway               | 18                  | $1.40 \times 10^{-3}$ | $3.40 \times 10^{-2}$ |
| Glycolysis/Gluconeogenesis                             | 13                  | $1.60 \times 10^{-3}$ | $3.70 \times 10^{-2}$ |
| Th17 cell differentiation                              | 17                  | $1.80 \times 10^{-3}$ | $3.80 \times 10^{-2}$ |
| Th1 and Th2 cell differentiation                       | 15                  | $2.20 \times 10^{-3}$ | $4.50 \times 10^{-2}$ |

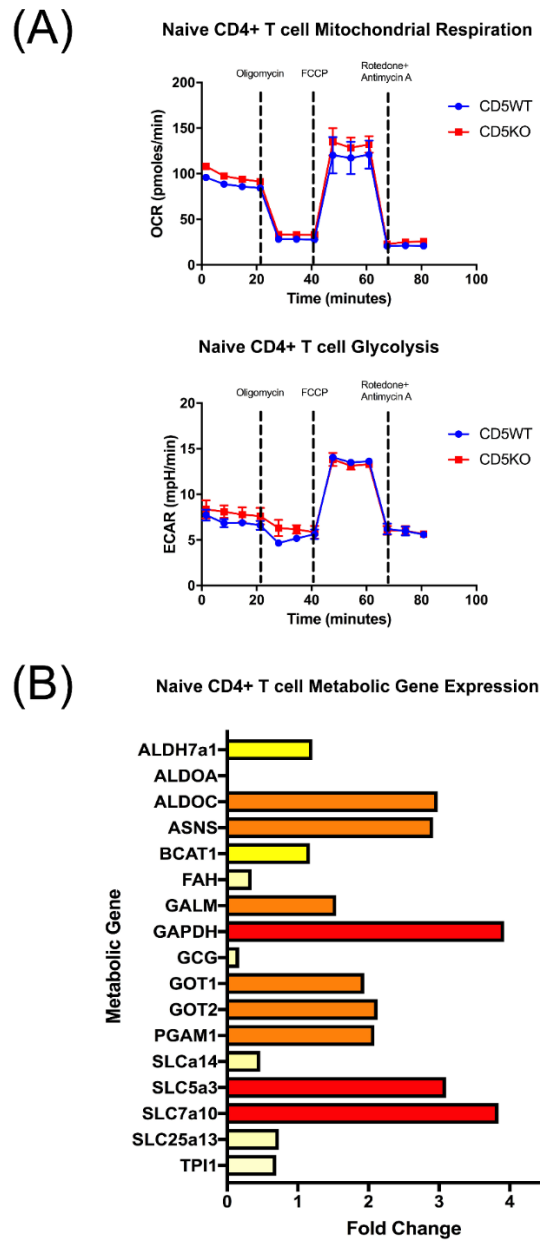

**Figure S2.** Naïve CD5KO CD4<sup>+</sup> T cells demonstrate somewhat similar metabolic profiles in comparison to unstimulated CD5KO CD4<sup>+</sup> T cells. **(A)** The Mito Stress Test (Agilent) was used to measure naïve T cell metabolism between CD4<sup>+</sup> CD5WT and CD5KO T cells ( $n = 1$ ). **(B)** qPCR of 18 metabolic genes compared between naïve CD5KO CD4<sup>+</sup> T cells and naïve CD4<sup>+</sup> T cells ( $n = 1$ ). Pale yellow = less than 1.0-fold change, yellow = 1.0-fold change or higher, pale orange = 1.5-fold change or higher, dark orange = 2.0-fold change or higher, red = 3.0-fold change or higher.
